# Supplementary material
Source: MDPI journal article supplement (https://www.mdpi.com/2304-6740/12/4/94)
Supplement: s1 [file s1]

# Electronic supplementary material

## Insight into the structure and redox chemistry of [carbonatotetraamminecobalt(III)] permanganate and its monohydrate as Co-Mn-oxide catalyst precursors of the Fischer-Tropsch synthesis

Kende Béres<sup>1,2</sup>, Zsolt Dürvanger<sup>3,4</sup>, Zoltán Homonnay<sup>5</sup>, Laura Bereczki<sup>1,6</sup>, Berta Barta Holló<sup>7</sup>, Attila Farkas<sup>8</sup>, Vladimir M. Petrushevski<sup>9</sup> and László Kótai<sup>1,10\*</sup>

<sup>1</sup> Institute of Materials and Environmental Chemistry, HUN-REN Research Centre for Natural Sciences, Budapest, Hungary; beres.kende.attila@ttk.hu (K.A.B.); nagyne.bereczki.laura@ttk.mta.hu (L.B.)

<sup>2</sup> György Hevesy PhD School of Chemistry, ELTE Eötvös Loránd University, Budapest, Hungary

<sup>3</sup> Structural Chemistry and Biology Laboratory, Institute of Chemistry, ELTE Eötvös Loránd University, Budapest, Hungary

<sup>4</sup> ELKH-ELTE Protein Modelling Research Group, Budapest, Hungary; zsolt.durvanger@ttk.elte.hu

<sup>5</sup> Institute of Chemistry, ELTE Eötvös Loránd University, Budapest, Hungary; homonnay.zoltan@ttk.elte.hu

<sup>6</sup> Centre for Structural Science, HUN-REN Research Centre for Natural Sciences, H-1117 Budapest, Hungary

<sup>7</sup> Department of Chemistry, Biochemistry and Environmental Protection, Faculty of Sciences, University of Novi Sad, Novi Sad, Serbia

<sup>8</sup> Department of Organic Chemistry and Technology, Faculty of Chemical Technology and Biotechnology, Budapest University of Technology and Economics, Budapest, Hungary; farkas.attila@vbk.bme.hu

<sup>9</sup> Faculty of Natural Sciences and Mathematics, Ss. Cyril and Methodius University, MK-1000 Skopje, North Macedonia; vladop@pmf.ukim.mk

<sup>10</sup> Deuton-X Ltd., H-2030, Érd, Hungary

\* Correspondence: kotai.laszlo@ttk.hu.

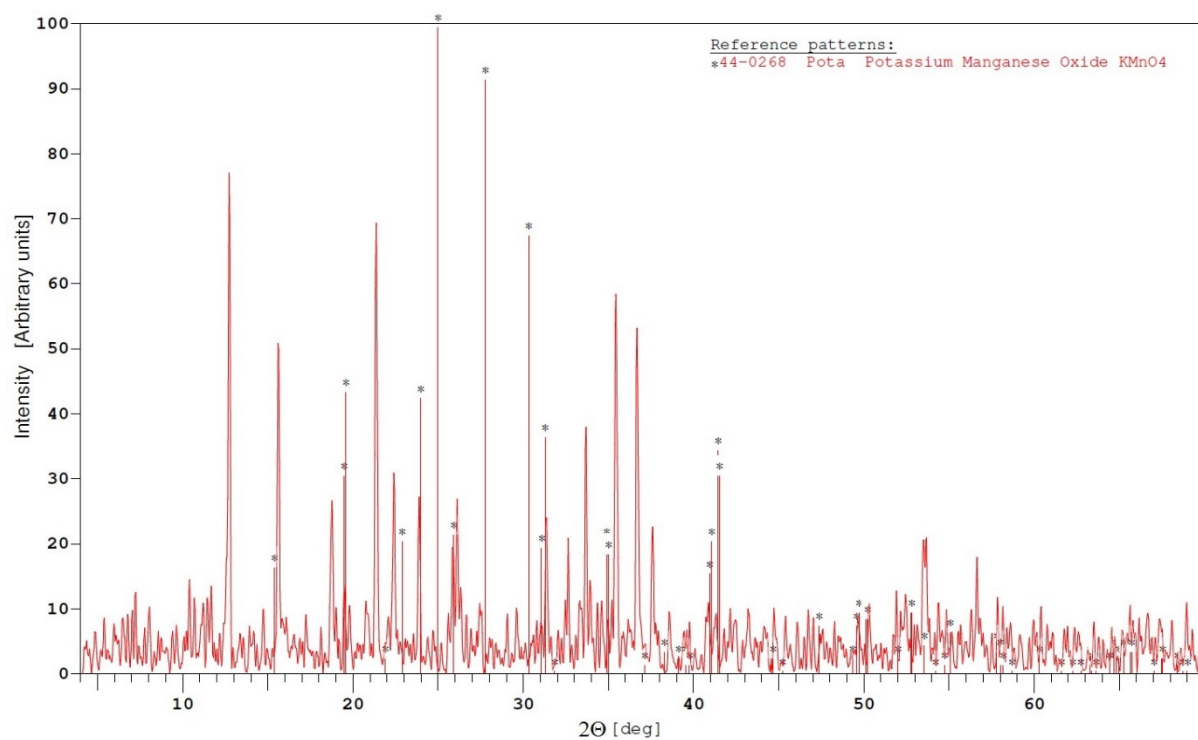

**Figure S1** Powder-XRD study of the reaction product of synthesis root described in ref. [4].

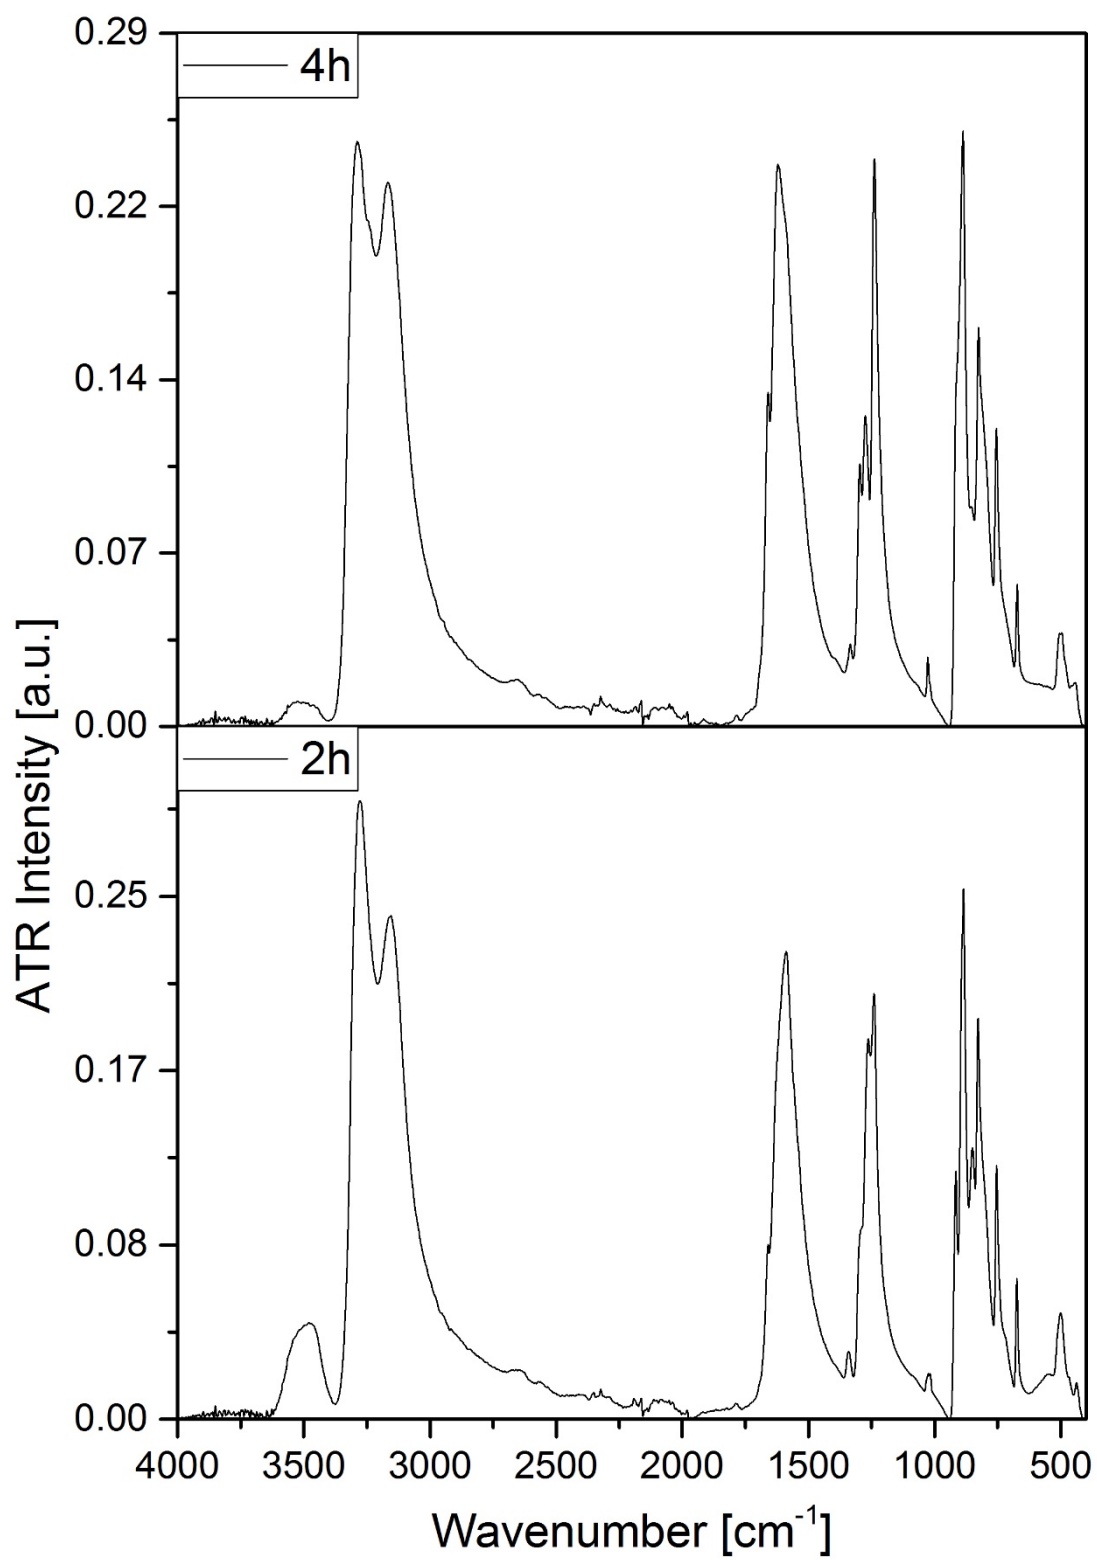

**Figure S2** Analytical range IR study of heat treatment residues of compound **2**.

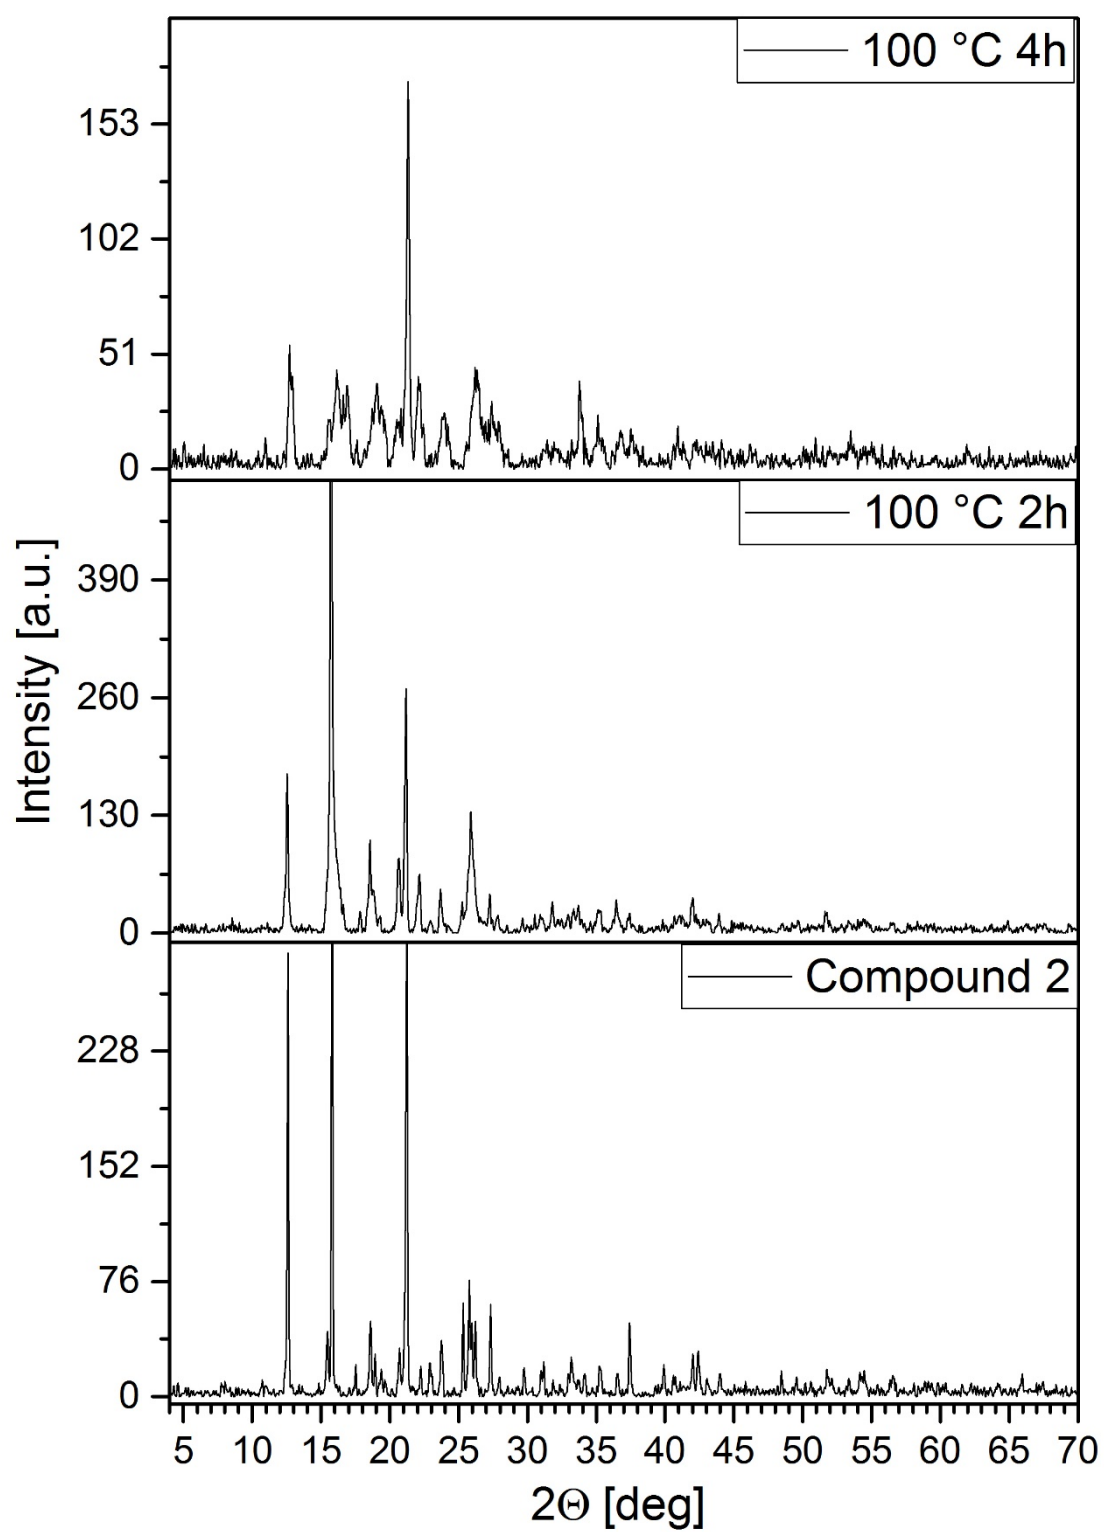

**Figure S3** Powder-XRD of Compound 2, partially (2 h), and completely dehydrated products (4 h) – Compound 1.

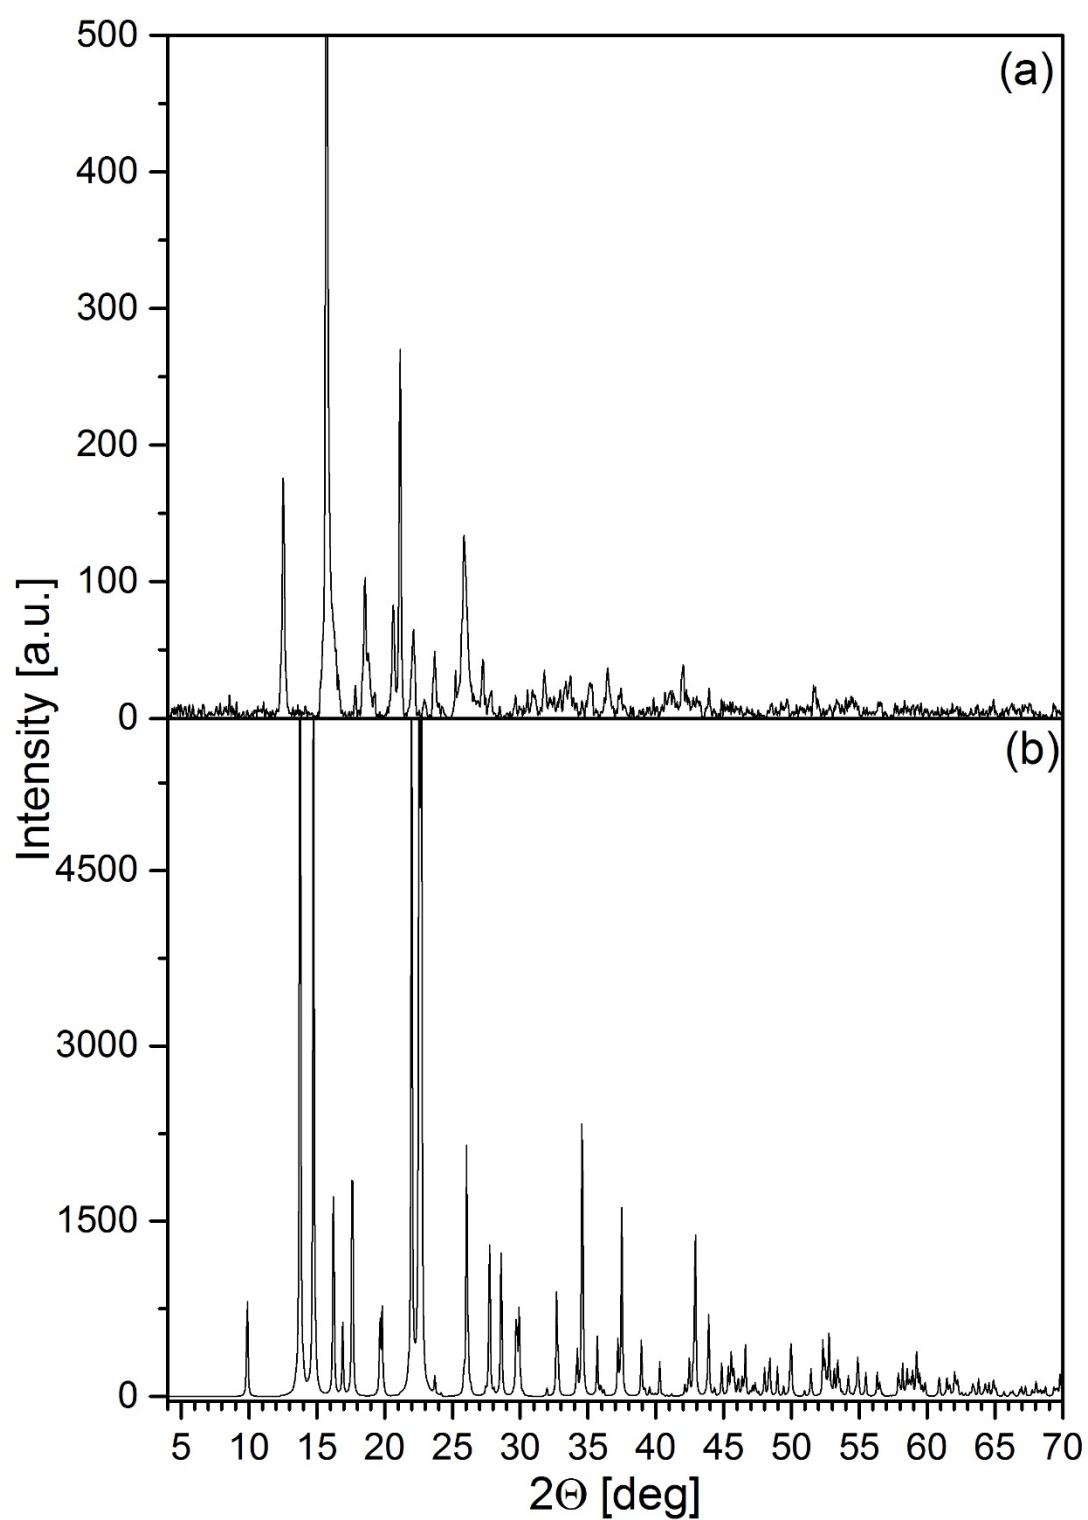

**Figure S4** Powder-XRD of (a) Compound **1** and (b)  $[\text{Co}(\text{NH}_3)_4\text{CO}_3]\text{ClO}_4$ .

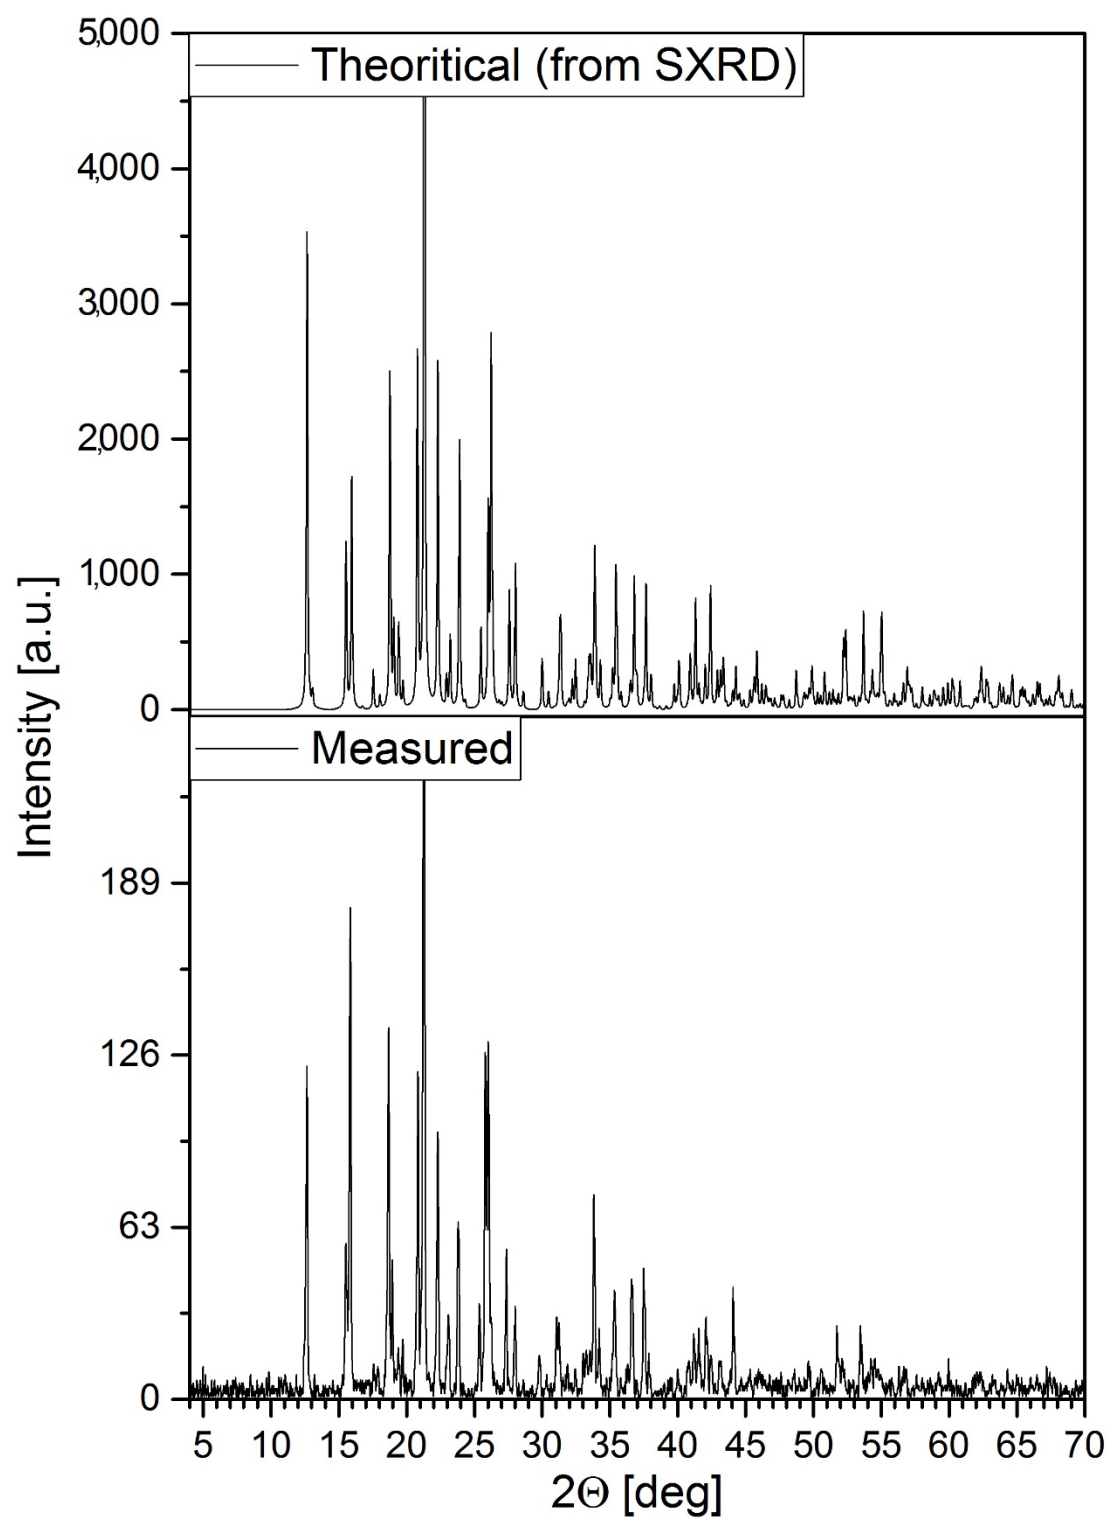

**Figure S5** Measured and theoretical Powder-XRD of Compound 2.

**Table S1** Crystallographic parameters of the orthorhombic compound **2**.

|                                   |                                                       |          |
|-----------------------------------|-------------------------------------------------------|----------|
| Empirical formula                 | C H <sub>14</sub> Co Mn N <sub>4</sub> O <sub>8</sub> |          |
| Formula weight                    | 324.03                                                |          |
| Temperature                       | 101.1(6) K                                            |          |
| Wavelength                        | 1.54184 Å                                             |          |
| Crystal system                    | Orthorhombic                                          |          |
| Space group                       | Pbca                                                  |          |
| Unit cell dimensions              | a = 11.10180(10) Å                                    | α = 90°. |
|                                   | b = 10.57700(10) Å                                    | β = 90°. |
|                                   | c = 17.06750(10) Å                                    | γ = 90°. |
| Volume                            | 2004.13(3) Å <sup>3</sup>                             |          |
| Z                                 | 8                                                     |          |
| Density (calculated)              | 2.148 Mg/m <sup>3</sup>                               |          |
| Absorption coefficient            | 23.593 mm <sup>-1</sup>                               |          |
| F(000)                            | 1312                                                  |          |
| Crystal size                      | 0.114 x 0.081 x 0.034 mm <sup>3</sup>                 |          |
| Theta range for data collection   | 5.183 to 75.421°.                                     |          |
| Index ranges                      | -13 ≤ h ≤ 13, -13 ≤ k ≤ 12, -21 ≤ l ≤ 21              |          |
| Reflections collected             | 58908                                                 |          |
| Independent reflections           | 2073 [R(int) = 0.0429]                                |          |
| Completeness to theta = 67.684°   | 100.0 %                                               |          |
| Absorption correction             | Analytical                                            |          |
| Max. and min. transmission        | 0.572 and 0.208                                       |          |
| Refinement method                 | Full-matrix least-squares on F <sup>2</sup>           |          |
| Data / restraints / parameters    | 2073 / 0 / 144                                        |          |
| Goodness-of-fit on F <sup>2</sup> | 1.126                                                 |          |
| Final R indices [I > 2σ(I)]       | R1 = 0.0224, wR2 = 0.0505                             |          |
| R indices (all data)              | R1 = 0.0228, wR2 = 0.0506                             |          |
| Extinction coefficient            | 0.00014(3)                                            |          |
| Largest diff. peak and hole       | 0.307 and -0.267 e·Å <sup>-3</sup>                    |          |

**Table S2** Bond lengths [Å] and angles [°] in the structure of compound **2**.

---

|                 |            |
|-----------------|------------|
| Co(1)-O(2)      | 1.9252(14) |
| Co(1)-O(1)      | 1.9273(13) |
| Co(1)-N(1)      | 1.9389(16) |
| Co(1)-N(3)      | 1.9511(17) |
| Co(1)-N(2)      | 1.9538(16) |
| Co(1)-N(4)      | 1.9543(16) |
| Co(1)-C(1)      | 2.3303(19) |
| Mn(1)-O(5)      | 1.6103(14) |
| Mn(1)-O(6)      | 1.6183(15) |
| Mn(1)-O(7)      | 1.6210(14) |
| Mn(1)-O(4)      | 1.6249(15) |
| O(2)-C(1)       | 1.318(2)   |
| O(1)-C(1)       | 1.310(2)   |
| O(3)-C(1)       | 1.242(2)   |
|                 |            |
| O(2)-Co(1)-O(1) | 68.62(6)   |
| O(2)-Co(1)-N(1) | 97.39(6)   |
| O(1)-Co(1)-N(1) | 165.97(6)  |
| O(2)-Co(1)-N(3) | 168.88(6)  |
| O(1)-Co(1)-N(3) | 100.32(6)  |
| N(1)-Co(1)-N(3) | 93.64(7)   |
| O(2)-Co(1)-N(2) | 91.00(6)   |
| O(1)-Co(1)-N(2) | 88.48(6)   |
| N(1)-Co(1)-N(2) | 90.87(7)   |
| N(3)-Co(1)-N(2) | 87.45(7)   |
| O(2)-Co(1)-N(4) | 89.75(6)   |
| O(1)-Co(1)-N(4) | 89.83(6)   |
| N(1)-Co(1)-N(4) | 91.13(7)   |
| N(3)-Co(1)-N(4) | 91.41(7)   |
| N(2)-Co(1)-N(4) | 177.76(7)  |
| O(2)-Co(1)-C(1) | 34.43(6)   |
| O(1)-Co(1)-C(1) | 34.20(6)   |
| N(1)-Co(1)-C(1) | 131.79(7)  |
| N(3)-Co(1)-C(1) | 134.48(7)  |
| N(2)-Co(1)-C(1) | 89.06(7)   |
| N(4)-Co(1)-C(1) | 90.37(7)   |



|                 |            |
|-----------------|------------|
| O(5)-Mn(1)-O(6) | 110.17(8)  |
| O(5)-Mn(1)-O(7) | 109.00(7)  |
| O(6)-Mn(1)-O(7) | 108.84(8)  |
| O(5)-Mn(1)-O(4) | 109.89(8)  |
| O(6)-Mn(1)-O(4) | 109.32(7)  |
| O(7)-Mn(1)-O(4) | 109.60(8)  |
| C(1)-O(2)-Co(1) | 89.86(11)  |
| C(1)-O(1)-Co(1) | 90.01(11)  |
| O(3)-C(1)-O(1)  | 124.56(17) |
| O(3)-C(1)-O(2)  | 123.95(17) |
| O(1)-C(1)-O(2)  | 111.48(16) |
| O(3)-C(1)-Co(1) | 177.75(15) |
| O(1)-C(1)-Co(1) | 55.80(9)   |
| O(2)-C(1)-Co(1) | 55.71(9)   |

**Table S3** Atomic coordinates ( $\times 10^4$ ) and equivalent isotropic displacement parameters ( $\text{\AA}^2 \times 10^3$ ) in compound **2**. U(eq) is defined as one-third of the trace of the orthogonalized  $U^{ij}$  tensor.

|       | x       | y        | z       | U(eq) |
|-------|---------|----------|---------|-------|
| Co(1) | 6421(1) | 5173(1)  | 6144(1) | 7(1)  |
| Mn(1) | 7719(1) | 7630(1)  | 3399(1) | 10(1) |
| O(2)  | 6822(1) | 6942(1)  | 6094(1) | 11(1) |
| O(1)  | 5234(1) | 6110(1)  | 5559(1) | 10(1) |
| O(3)  | 5581(1) | 8196(1)  | 5388(1) | 14(1) |
| O(7)  | 7861(1) | 9151(1)  | 3323(1) | 15(1) |
| O(4)  | 6472(1) | 7185(1)  | 2984(1) | 17(1) |
| O(6)  | 8845(1) | 6960(1)  | 2963(1) | 19(1) |
| O(5)  | 7704(1) | 7251(1)  | 4312(1) | 20(1) |
| O(8)  | 4950(1) | 10558(2) | 6042(1) | 19(1) |
| N(1)  | 7812(1) | 4627(2)  | 6742(1) | 11(1) |
| N(4)  | 5511(2) | 5480(2)  | 7106(1) | 12(1) |
| N(3)  | 5762(2) | 3469(2)  | 6057(1) | 12(1) |
| N(2)  | 7270(2) | 4854(2)  | 5162(1) | 12(1) |
| C(1)  | 5855(2) | 7149(2)  | 5665(1) | 10(1) |

**Table S4** Anisotropic displacement parameters ( $\text{\AA}^2 \times 10^3$  in compound **2**. The anisotropic displacement factor exponent takes the form:  $-2\pi^2[h^2a^2U^{11} + \dots + 2hka \cdot b \cdot U^{12}]$ .

|       | U <sup>11</sup> | U <sup>22</sup> | U <sup>33</sup> | U <sup>23</sup> | U <sup>13</sup> | U <sup>12</sup> |
|-------|-----------------|-----------------|-----------------|-----------------|-----------------|-----------------|
| Co(1) | 9(1)            | 6(1)            | 8(1)            | 0(1)            | 0(1)            | 0(1)            |
| Mn(1) | 13(1)           | 9(1)            | 10(1)           | 0(1)            | 1(1)            | 0(1)            |
| O(2)  | 12(1)           | 8(1)            | 12(1)           | 0(1)            | -1(1)           | -1(1)           |
| O(1)  | 12(1)           | 8(1)            | 11(1)           | 0(1)            | -2(1)           | 0(1)            |
| O(3)  | 16(1)           | 9(1)            | 15(1)           | 2(1)            | 0(1)            | 2(1)            |
| O(7)  | 17(1)           | 13(1)           | 15(1)           | 2(1)            | 1(1)            | 0(1)            |
| O(4)  | 15(1)           | 17(1)           | 18(1)           | -3(1)           | 1(1)            | -1(1)           |
| O(6)  | 17(1)           | 18(1)           | 21(1)           | -6(1)           | 3(1)            | 2(1)            |
| O(5)  | 31(1)           | 14(1)           | 14(1)           | 2(1)            | 3(1)            | -3(1)           |
| O(8)  | 23(1)           | 15(1)           | 18(1)           | -2(1)           | -5(1)           | 5(1)            |
| N(1)  | 12(1)           | 10(1)           | 10(1)           | 1(1)            | -1(1)           | 1(1)            |
| N(4)  | 12(1)           | 12(1)           | 12(1)           | 2(1)            | 1(1)            | 1(1)            |
| N(3)  | 13(1)           | 11(1)           | 13(1)           | 1(1)            | -1(1)           | 0(1)            |
| N(2)  | 15(1)           | 9(1)            | 11(1)           | 1(1)            | 0(1)            | 1(1)            |
| C(1)  | 11(1)           | 9(1)            | 9(1)            | -2(1)           | 3(1)            | 1(1)            |

**Table S5** Hydrogen coordinates ( $\times 10^4$ ) and isotropic displacement parameters ( $\text{\AA}^2 \times 10^3$ ) in compound **2**.

|       | x    | y     | z    | U(eq) |
|-------|------|-------|------|-------|
| H(8A) | 4793 | 11067 | 5655 | 28    |
| H(8B) | 4865 | 9780  | 5887 | 28    |
| H(1A) | 8482 | 5027  | 6560 | 13    |
| H(1B) | 7905 | 3777  | 6689 | 13    |
| H(1C) | 7702 | 4822  | 7256 | 13    |
| H(4A) | 4713 | 5540  | 6991 | 14    |
| H(4B) | 5765 | 6215  | 7329 | 14    |
| H(4C) | 5632 | 4830  | 7446 | 14    |
| H(3A) | 5356 | 3393  | 5596 | 15    |
| H(3B) | 5250 | 3322  | 6463 | 15    |
| H(3C) | 6374 | 2896  | 6071 | 15    |
| H(2A) | 6744 | 4543  | 4801 | 14    |
| H(2B) | 7869 | 4282  | 5245 | 14    |
| H(2C) | 7593 | 5589  | 4981 | 14    |

**Table S6** Torsion angles [°] in compound **2**.

|                      |             |
|----------------------|-------------|
| Co(1)-O(1)-C(1)-O(3) | 177.31(18)  |
| Co(1)-O(1)-C(1)-O(2) | -1.62(14)   |
| Co(1)-O(2)-C(1)-O(3) | -177.32(17) |
| Co(1)-O(2)-C(1)-O(1) | 1.63(15)    |

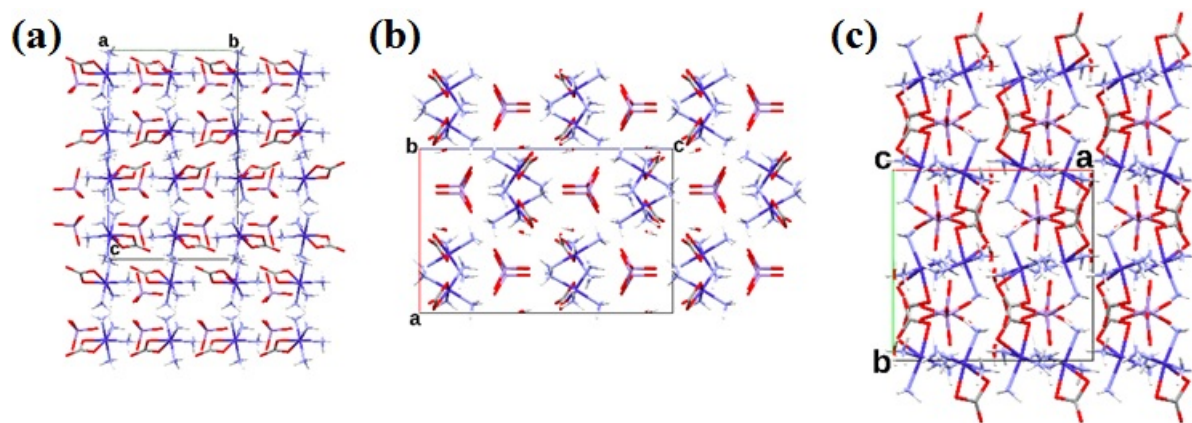

**Figure S6** Crystal packing in compound 2. View of the unit cell along the  $a$ ,  $b$  and  $c$  axes.

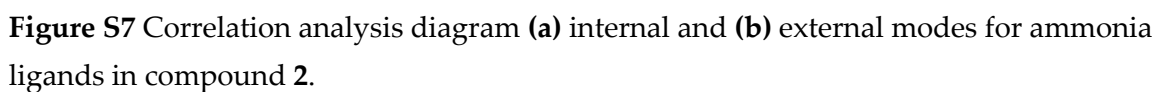

**Figure S7** Correlation analysis diagram **(a)** internal and **(b)** external modes for ammonia ligands in compound **2**.

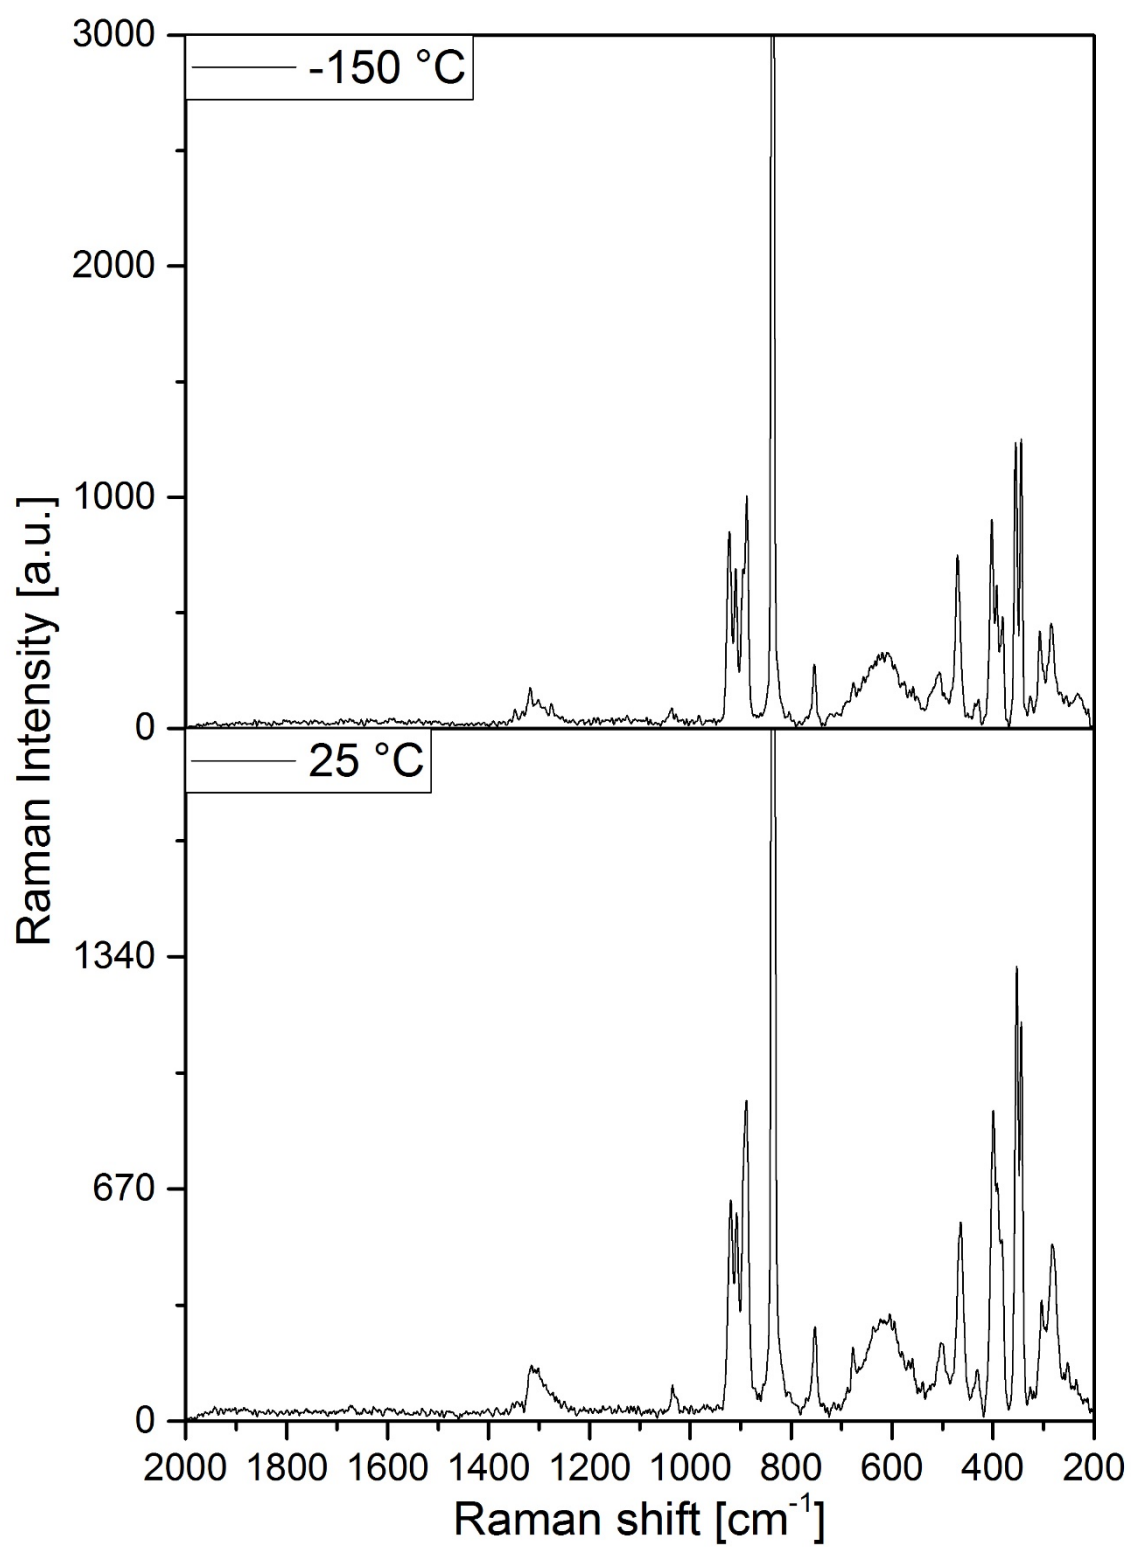

**Figure S8** Raman spectra of compound **1** measured with 785 nm laser.



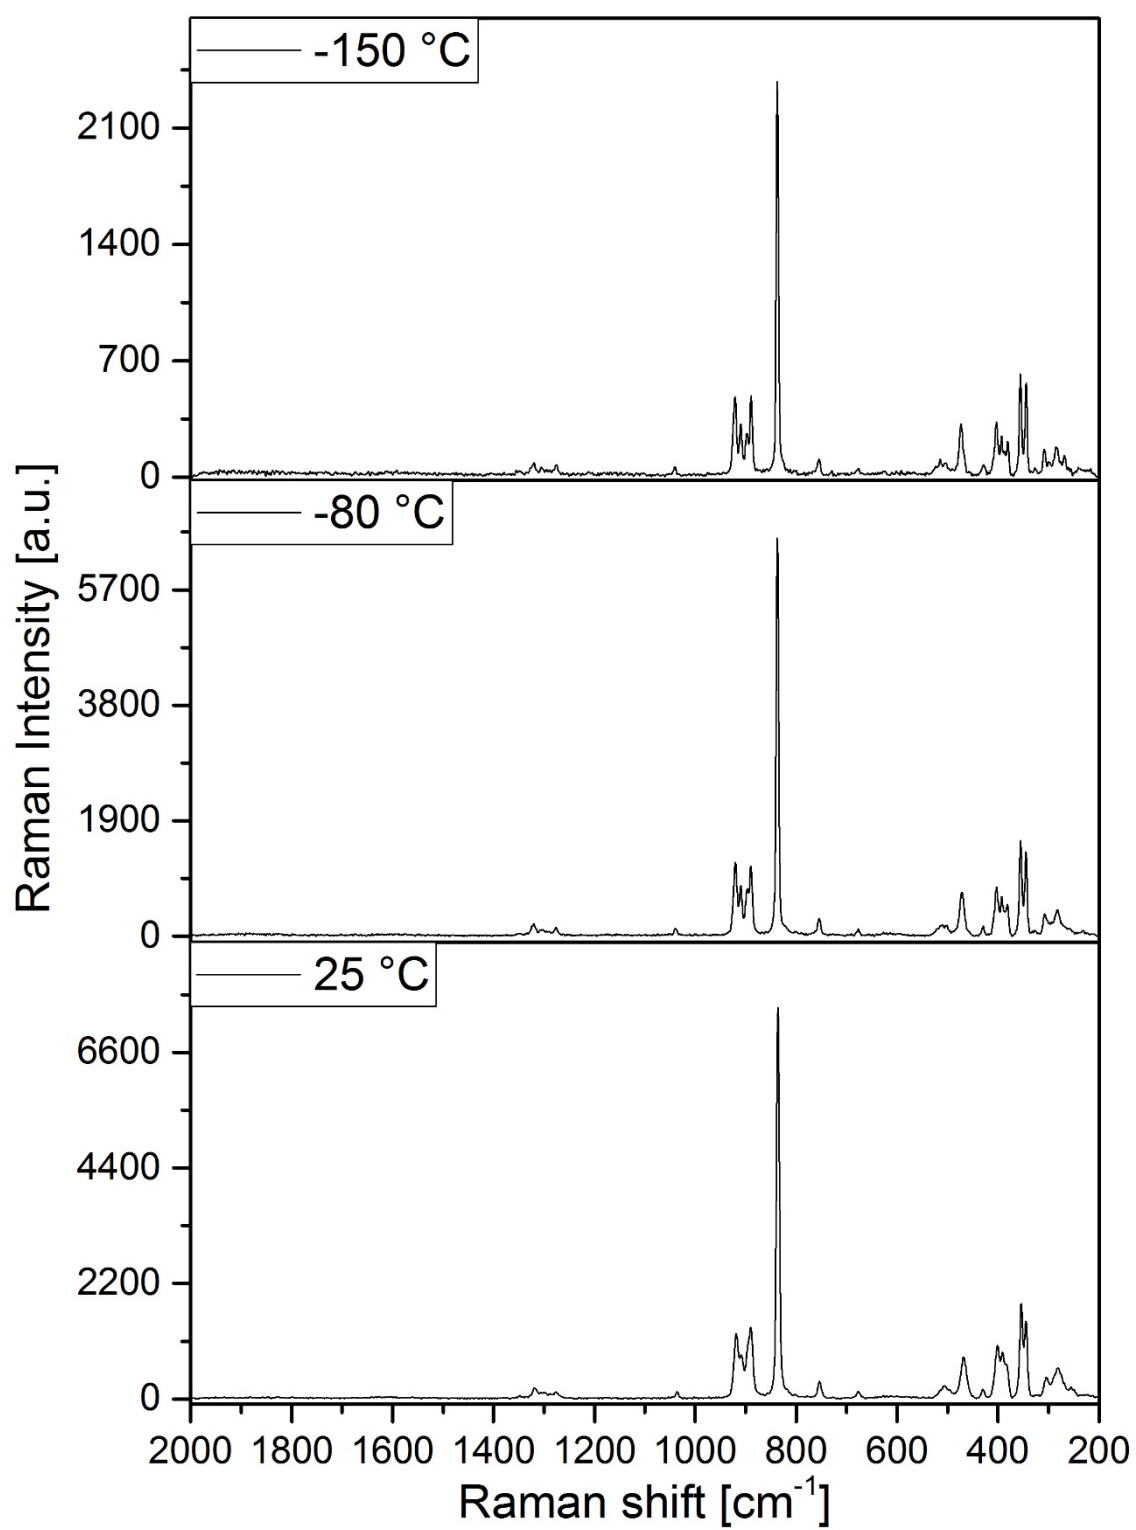

**Figure S9** Raman spectra of compound **2** measured with 785 nm laser.

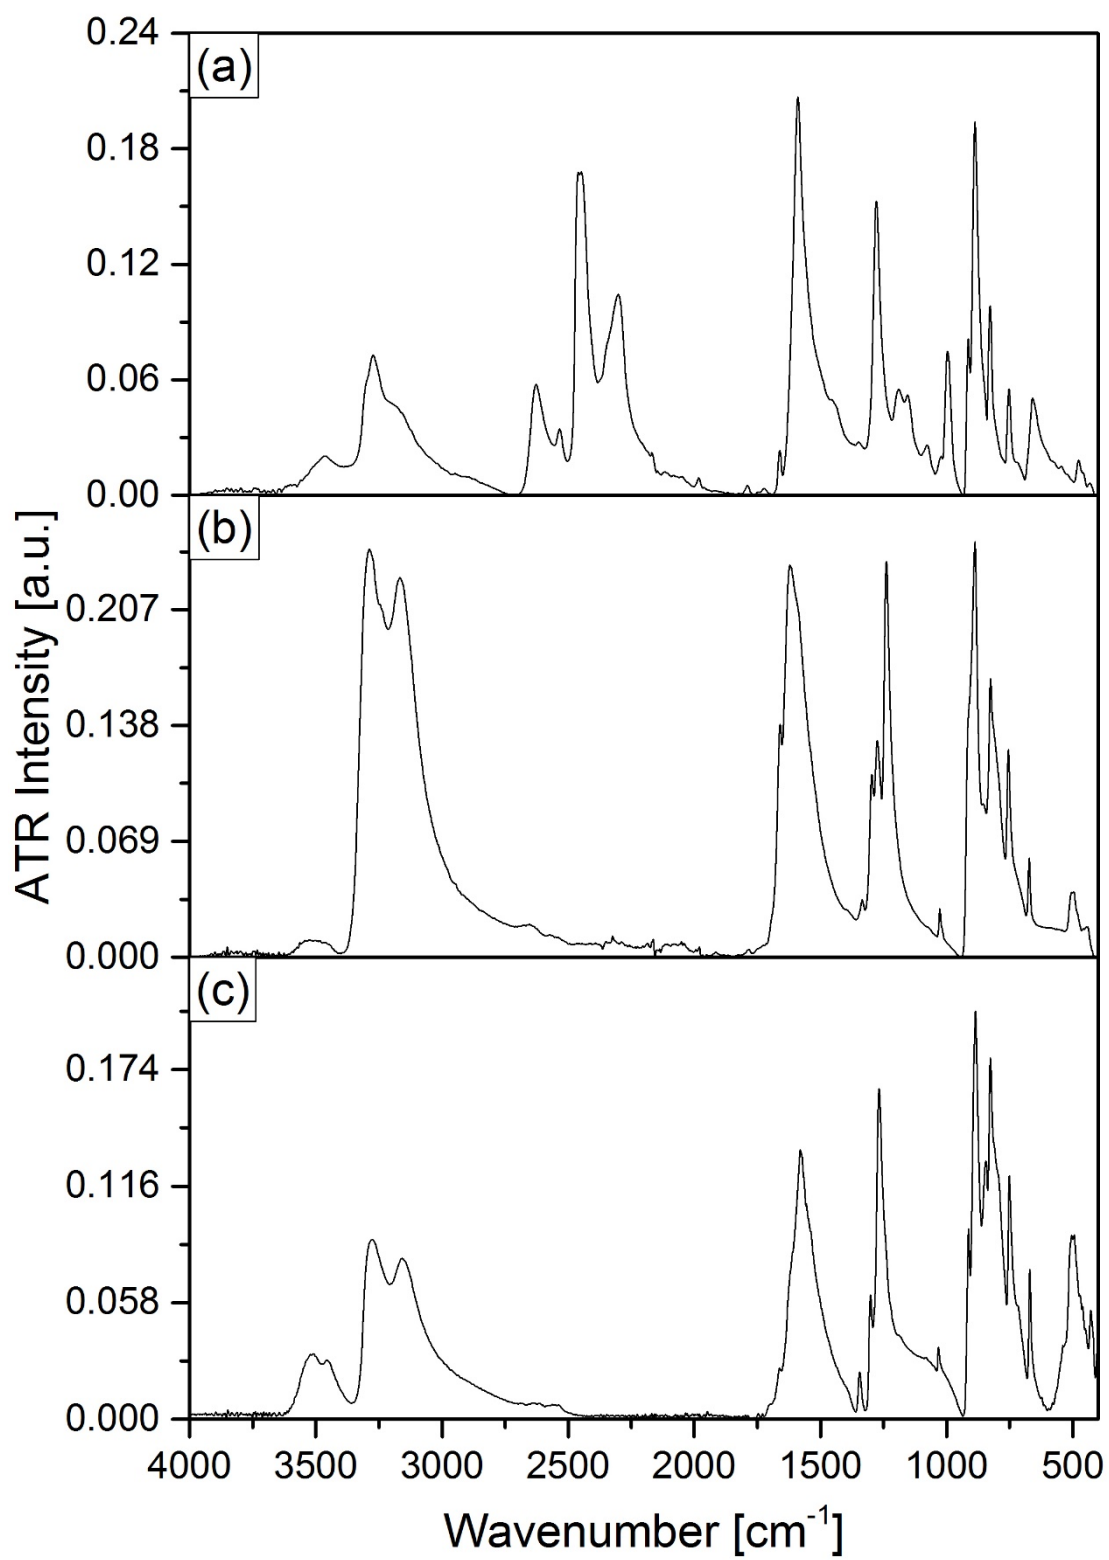

Figure S10 IR spectra of (a) compound 1, (b) compound 2, and (c) compound 2-D.

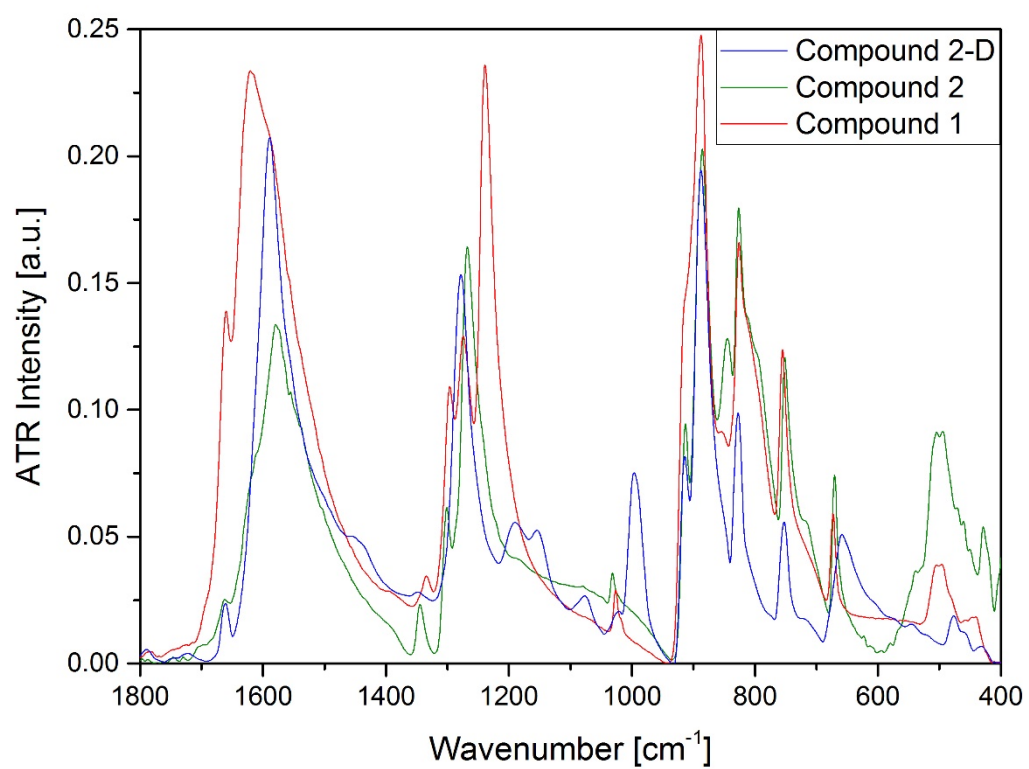

**Figure S11** IR spectra of compound 1, compound 2 and partially deuterated compound 2 (2-D) between 1800 and 400  $\text{cm}^{-1}$ .

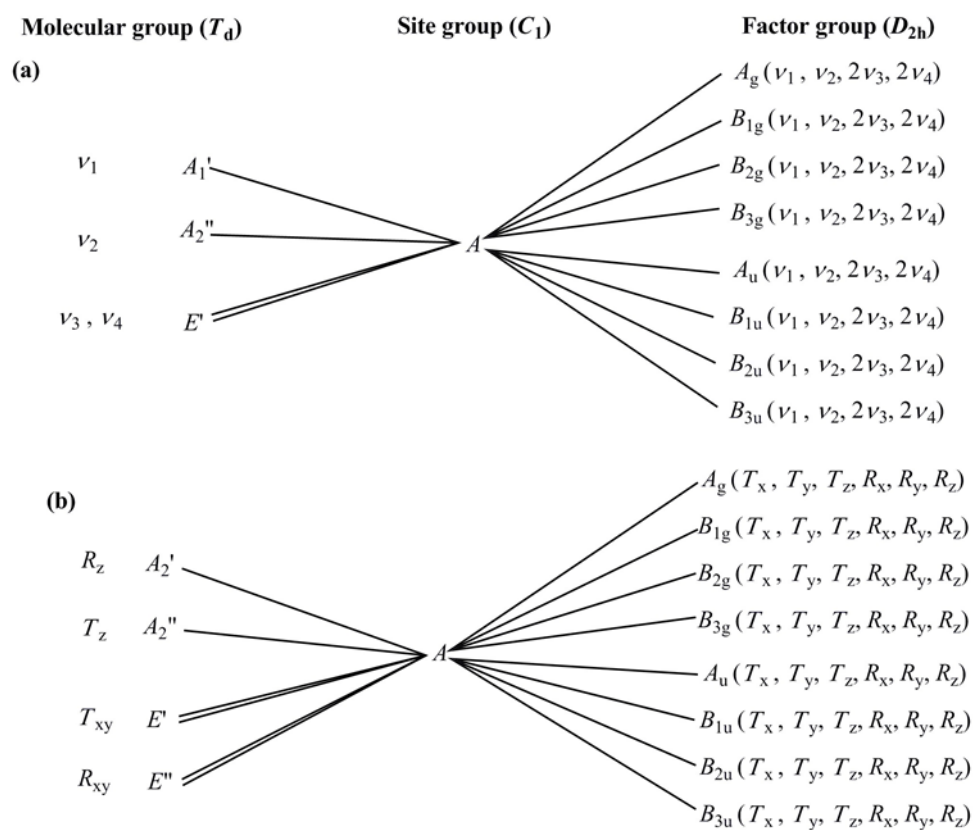

**Figure S12** Correlation analysis diagram **(a)** internal and **(b)** external modes for carbonate ligand in compound **2**.

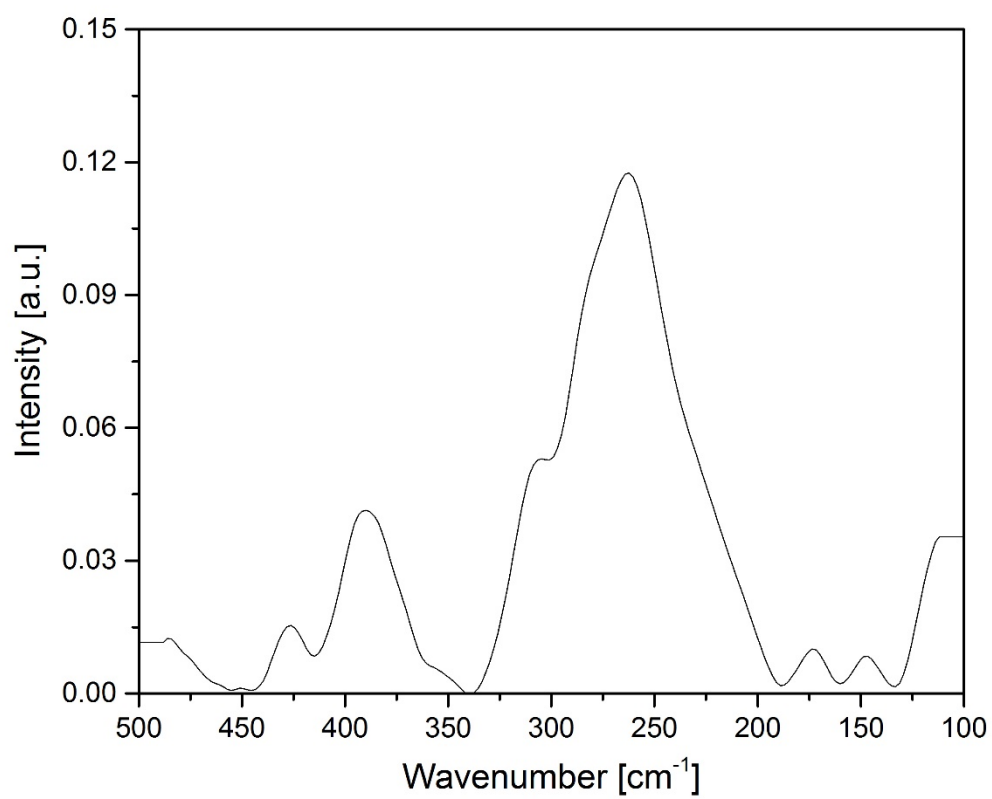

**Figure S13** The far-IR spectra of compound **2**.

**Table S7** The internal vibrational modes of CoN<sub>4</sub>O<sub>2</sub> core and their tentative assignments in the IR and Raman spectra of compounds **1** and **2**. (C<sub>2v</sub> symmetry is assumed)

| Species | Band            | IR, 298 K     |               | Raman (785 nm excitation) |         |               |                     | Calculated,<br>cm <sup>-1</sup> [46] | Assignments           |
|---------|-----------------|---------------|---------------|---------------------------|---------|---------------|---------------------|--------------------------------------|-----------------------|
|         |                 | Compound<br>1 | Compound<br>2 | Compound 1                |         | Compound<br>2 |                     |                                      |                       |
|         |                 |               |               | 298 K                     | 123 K   | 298 K         | 123<br>K            |                                      |                       |
| A1      | n <sub>1</sub>  | 524           | 505           | 502                       | 505     | 506           | 521,<br>514,<br>504 | 527                                  | n <sub>CoN</sub>      |
|         | n <sub>2</sub>  | 432           | 432           | 431                       | 435,429 | 430           | 428                 | 430                                  | n <sub>CoN</sub>      |
|         | n <sub>3</sub>  | 300sh         | 283           | 282                       | 284     | 282           | 284                 | 308                                  | d                     |
|         | n <sub>4</sub>  | 145           | 148           | n.m.                      | n.m.    | n.m.          | n.m.                | 149                                  | d                     |
|         | n <sub>5</sub>  | n.m.          | n.m.          | n.m.                      | n.m.    | n.m.          | n.m.                | 38                                   | d                     |
|         | n <sub>6</sub>  | 392*          | 390*          | 399*                      | 403*    | 401*          | 403*                | 396                                  | n <sub>as</sub> (CoO) |
| A2      | n <sub>9</sub>  | 490sh         | 485sh         | 490                       | 490     | 497           | 490                 | 496                                  | n <sub>CoN</sub>      |
|         | n <sub>10</sub> | 271           | 263           | 273sh                     | 274sh   | 275sh         | 269                 | 273                                  | d                     |
|         | n <sub>11</sub> | -             | -             | -                         | -       | -             | -                   | 201                                  | d                     |
| B2      | n <sub>12</sub> | 472sh         | 467sh         | 464                       | 470     | 468           | 472                 | 459                                  | n <sub>CoN</sub>      |
|         | n <sub>13</sub> | 179           | 175           | n.m.                      | n.m.    | n.m.          | n.m.                | 191                                  | d                     |
|         | n <sub>14</sub> | 315sh         | 310           | 303                       | 307     | 305           | 308                 | 318                                  | n <sub>s</sub> (CoO)  |
|         | n <sub>15</sub> | 118           | 112           | n.m.                      | n.m.    | n.m.          | n.m.                | 129                                  | d                     |

\*Overlapped band with  $\delta_{as}(\text{Mn-O})$ ; > n.m.-Not measured (out of measurement range)

Table S8 Assignment of the permanganate vibrational modes in the IR and Raman spectra of compounds **1** and **2**.

| Normal mode                | IR, cm <sup>-1</sup> |                   | Raman shift, cm <sup>-1</sup> |                     |                   |                    |
|----------------------------|----------------------|-------------------|-------------------------------|---------------------|-------------------|--------------------|
|                            | Compound <b>1</b>    | Compound <b>2</b> | Compound <b>1</b>             |                     | Compound <b>2</b> |                    |
|                            |                      |                   | 298 K                         | 123 K               | 298 K             | 123 K              |
| $\nu_s(\text{Mn-O})$       | 853                  | 847               | 836                           | 836                 | 836               | 837                |
| $\delta_s(\text{Mn-O})$    | -                    | 360sh             | 353,345                       | 355,345             | 354,344           | 355, 345           |
| $\nu_{as}(\text{Mn-O})$    | 914sh, 887           | 914,887           | 920, 908, 889                 | 923, 910,896sh, 888 | 919, 909, 891     | 921, 910, 897, 889 |
| $\delta_{as}(\text{Mn-O})$ | 392                  | 392               | 399*, 391,383                 | 403*, 393, 381      | 401*, 391, 383    | 403*, 393,381      |

\*Overlapped bands

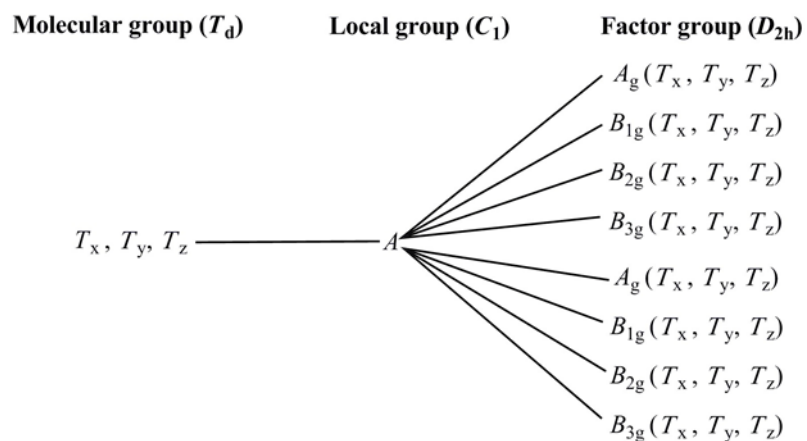

**Figure S14** Correlation analysis diagram for central  $\text{Co}^{\text{III}}$  ion in compound **2**.



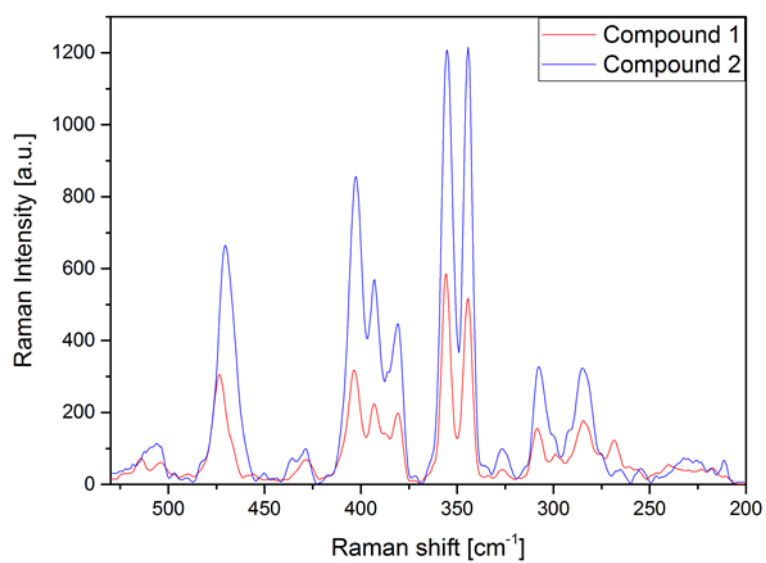

**Figure S15** The Raman spectra of compounds **1** and **2** recorded at 123 K in the far-IR region.

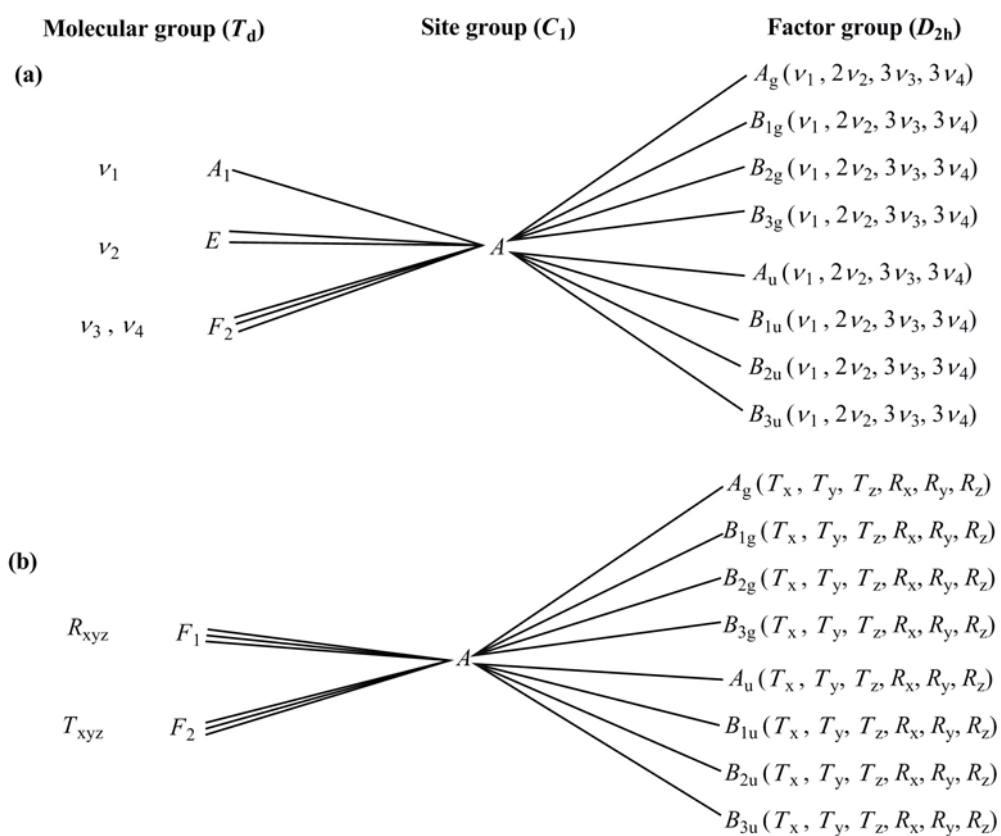

**Figure S16** Correlation analysis diagram for the permanganate ion in compound 2.

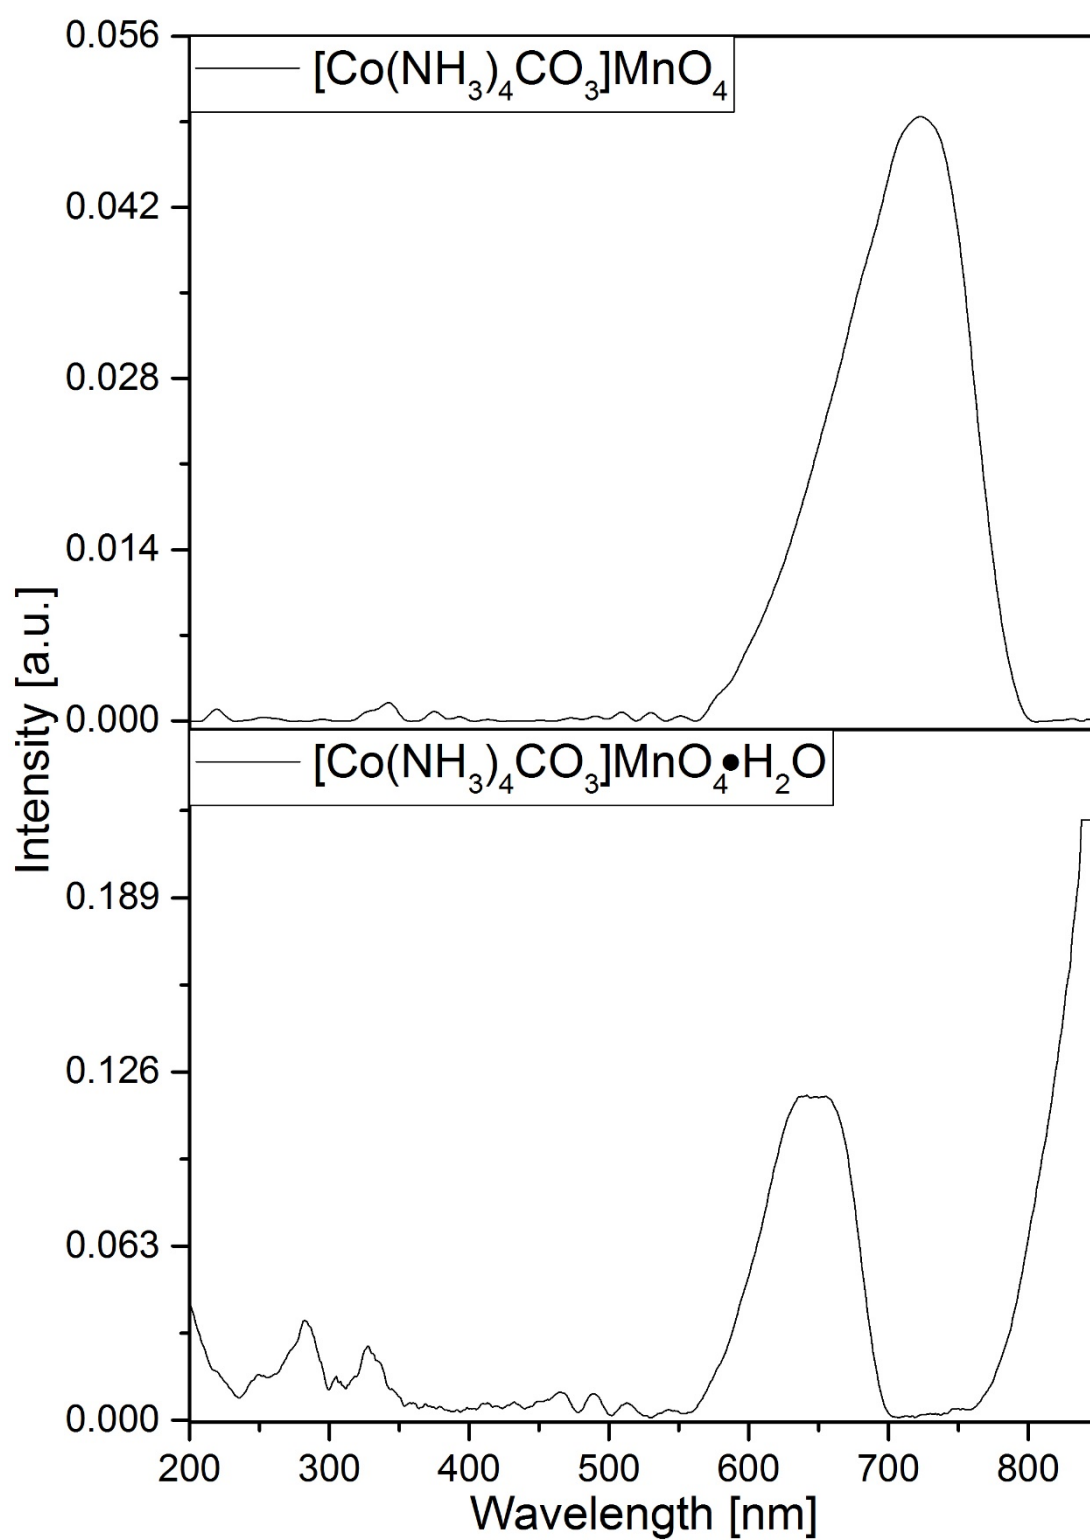

Figure S17 UV-VIS spectra of compounds 1 and 2.

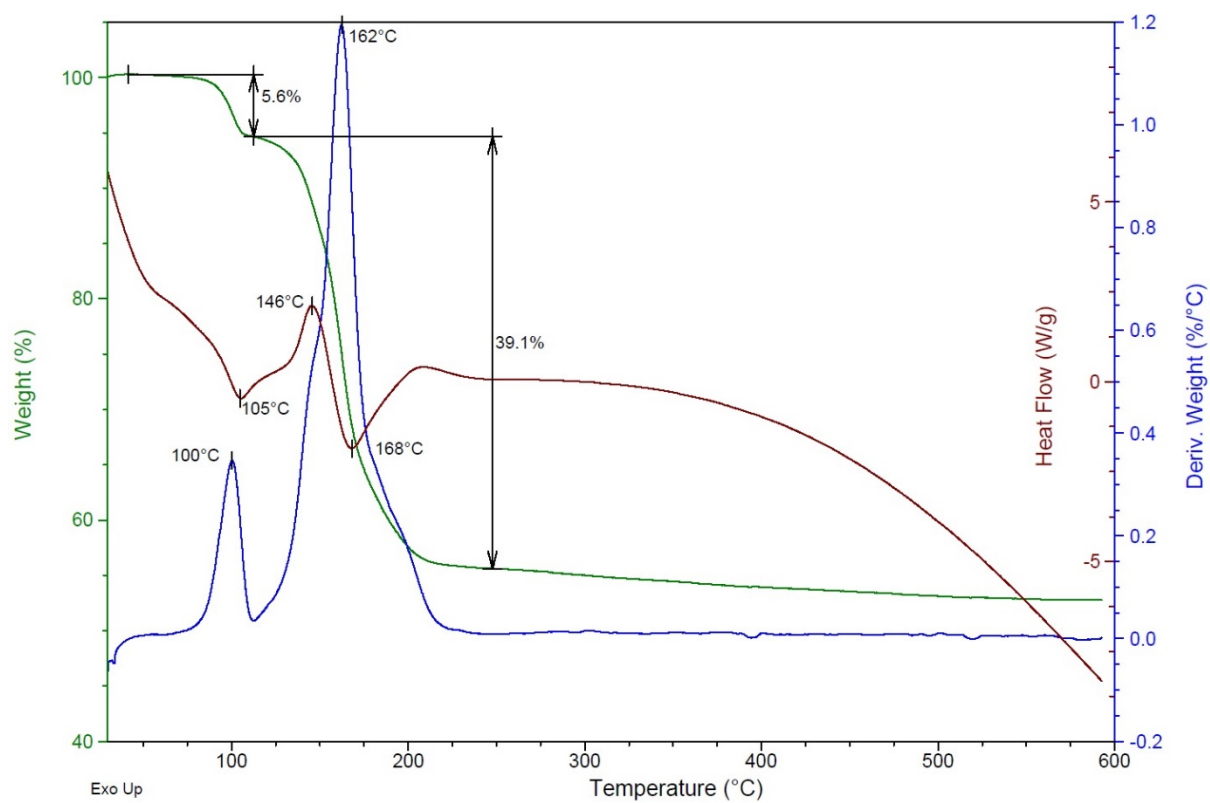

**Figure S18** TG (green), DTG (blue), and DTA (red) curve of compound **2** in an inert atmosphere

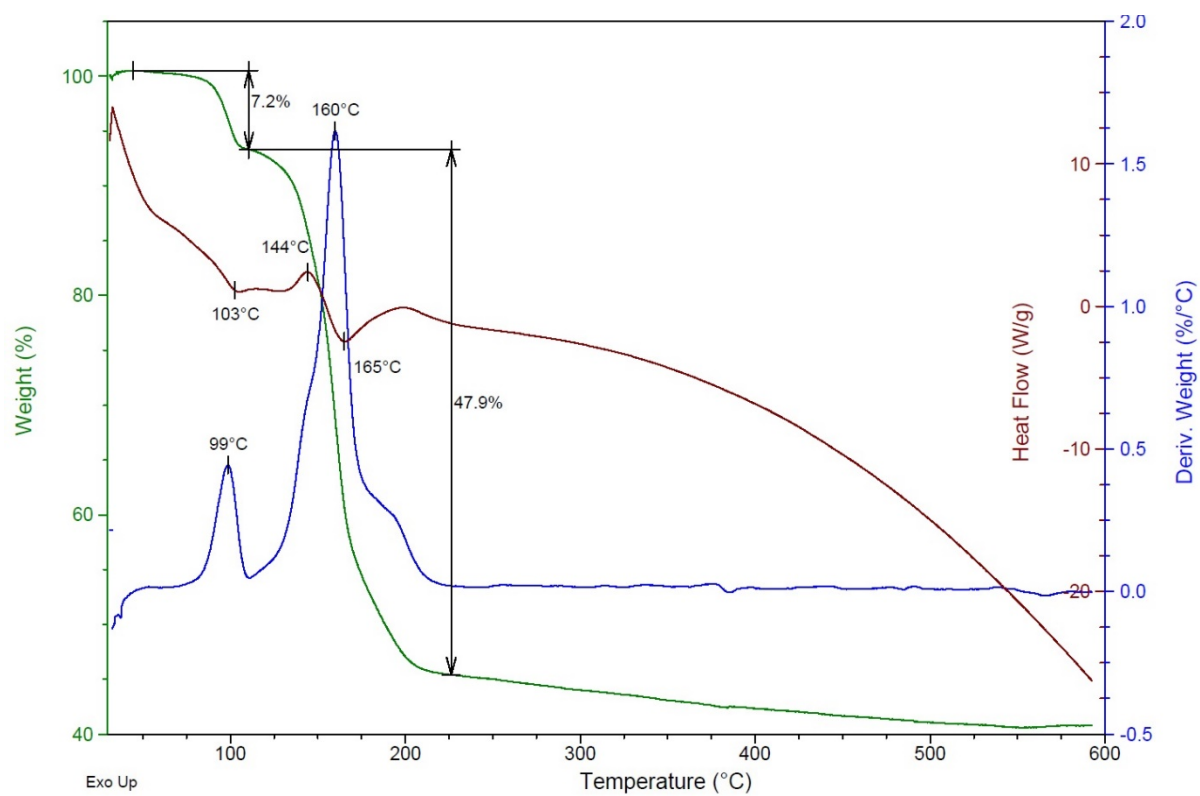

**Figure S19** TG (green), DTG (blue), and DTA (red) curve of compound **2** in air.

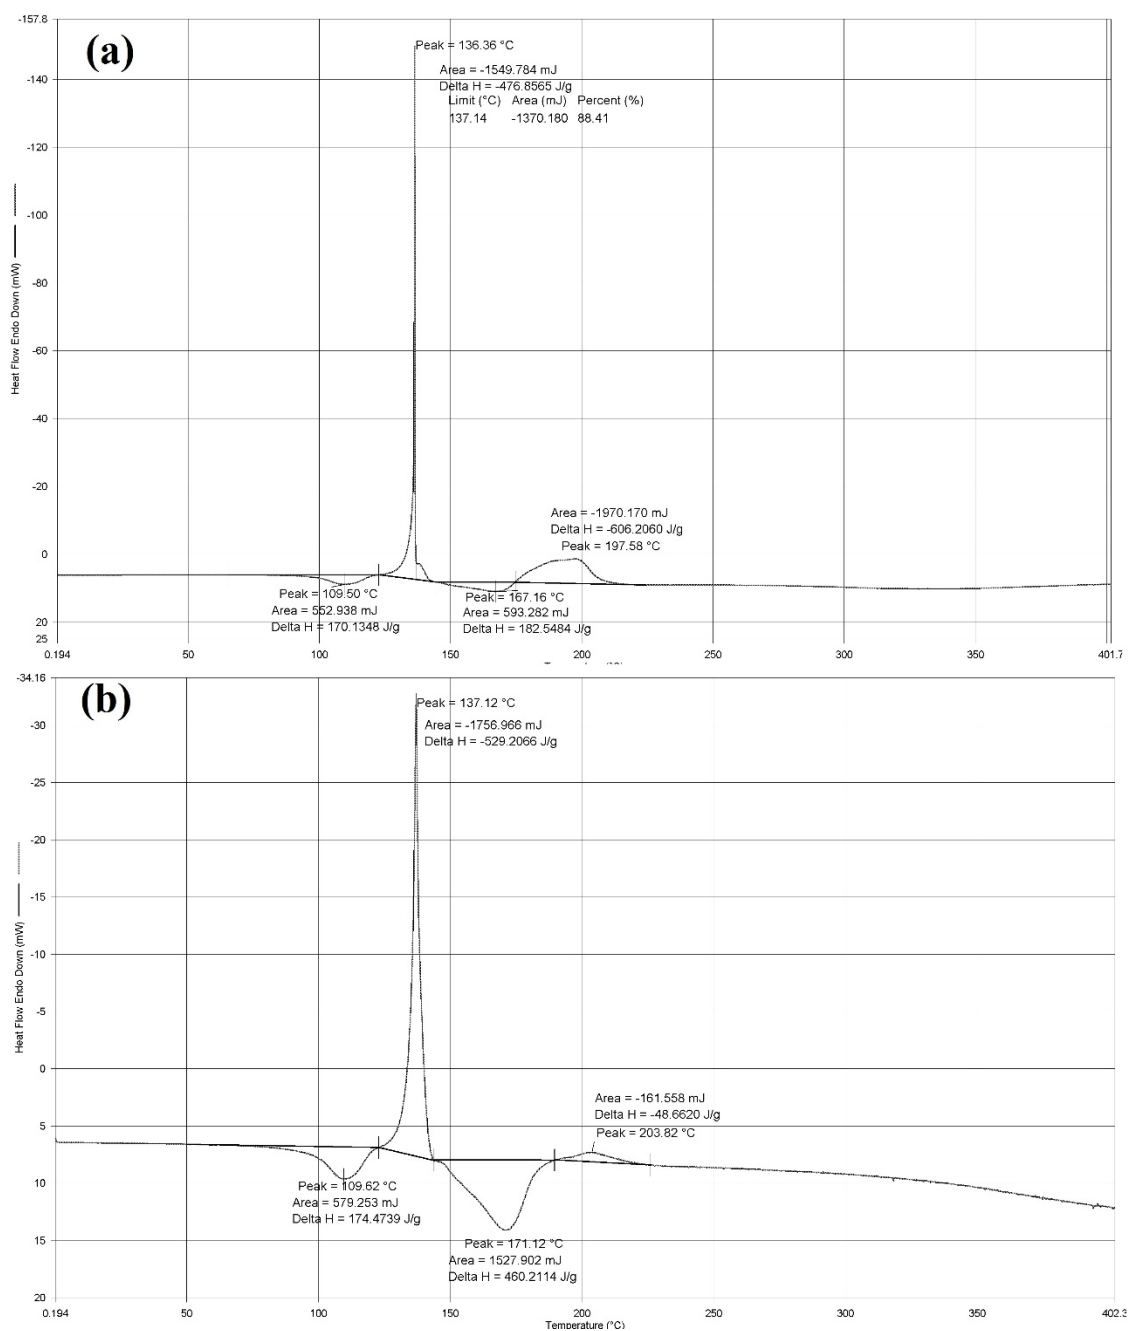

**Figure S20** DSC of compound **2** under in an **(a)** O<sub>2</sub> and **(b)** N<sub>2</sub> atmosphere.

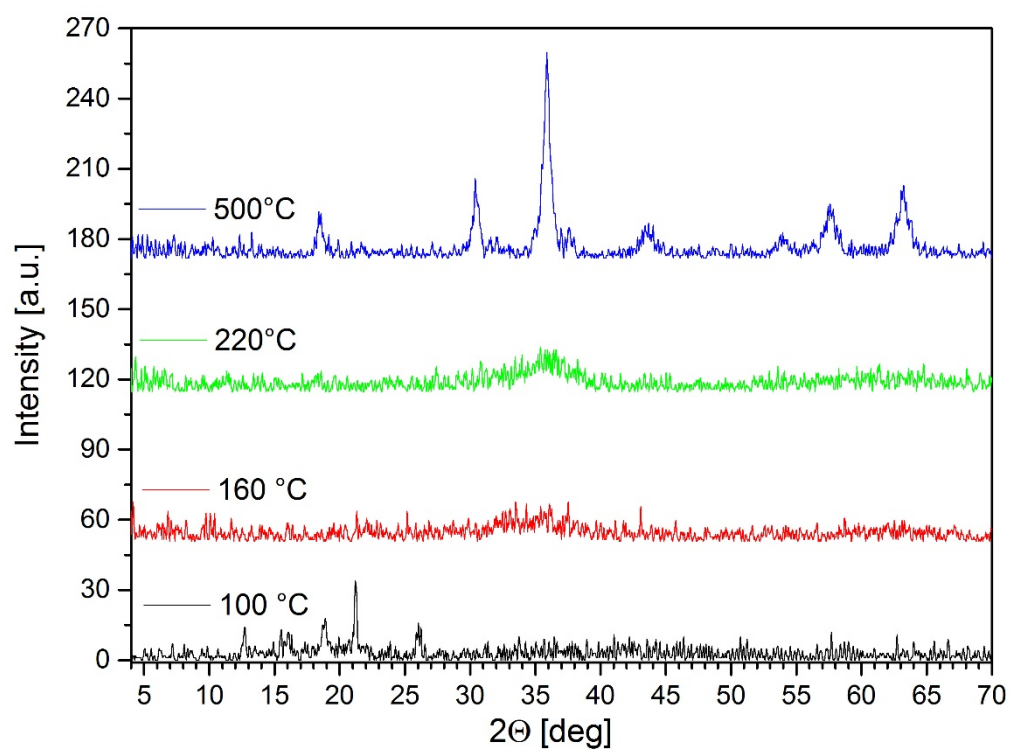

**Figure S21** PXRD of the thermal decomposition products of compound **2** under an inert atmosphere (I-100 (compound 1), I-160, I-200 and I-500).

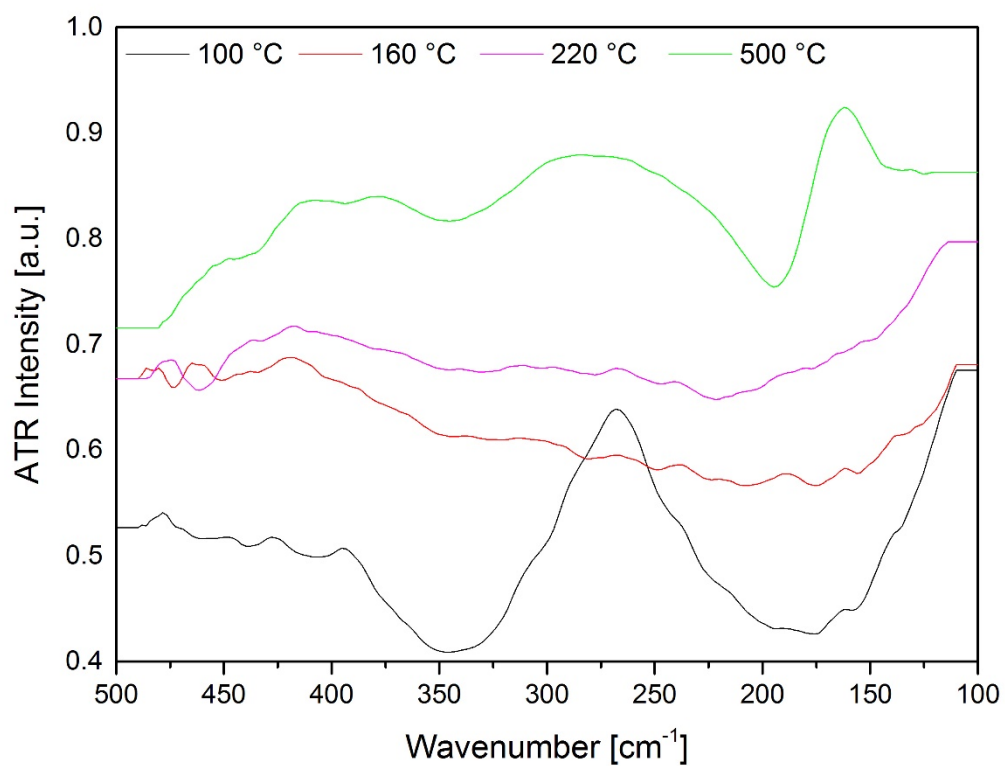

**Figure S22** Far-IR spectra of the thermal decomposition products of compound **2** under an inert atmosphere.



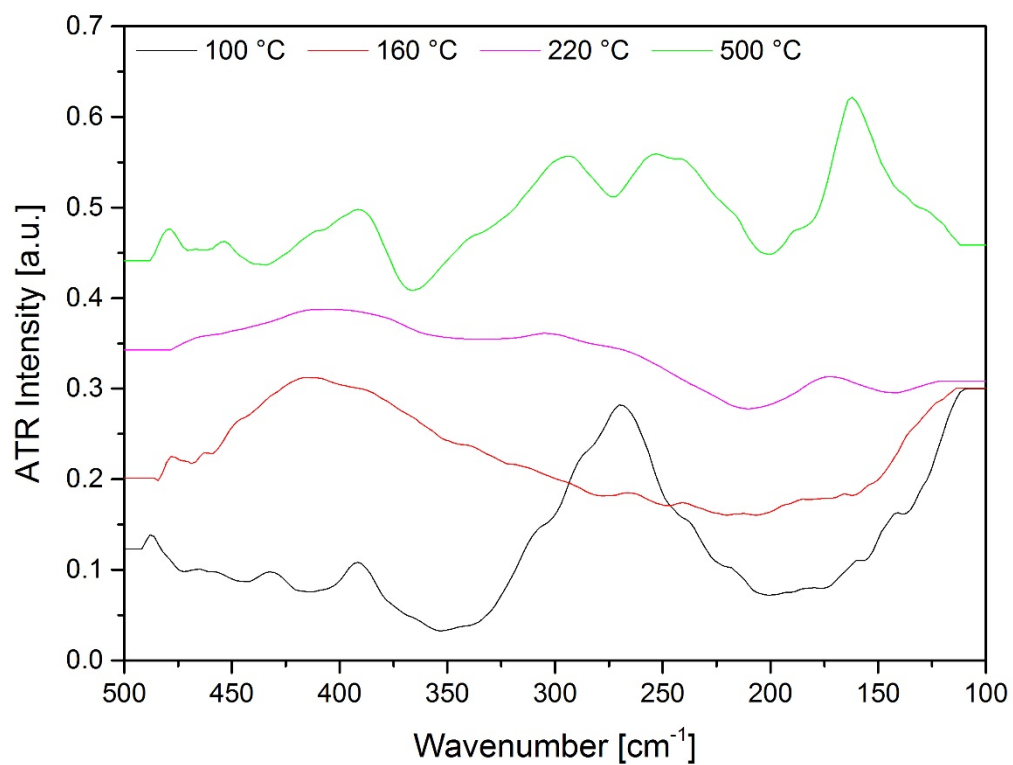

**Figure S23** Far-IR spectra of the thermal decomposition products of compound **2** under an aerial atmosphere.

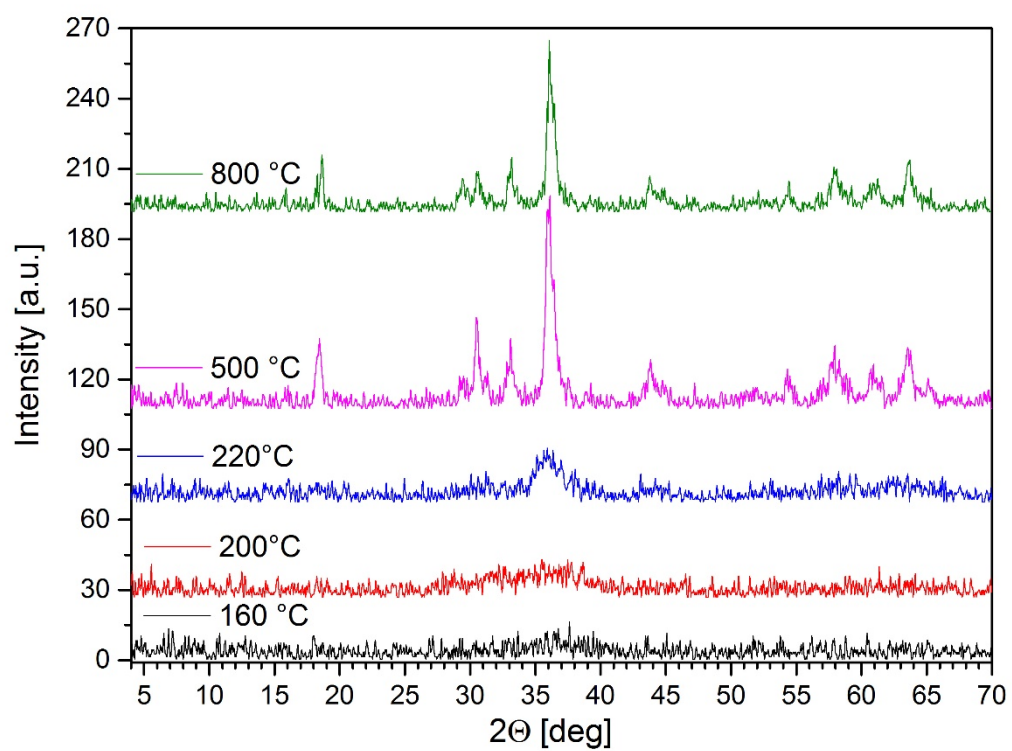

**Figure S24** PXRD of the thermal decomposition products of compound **2** under an aerial atmosphere.

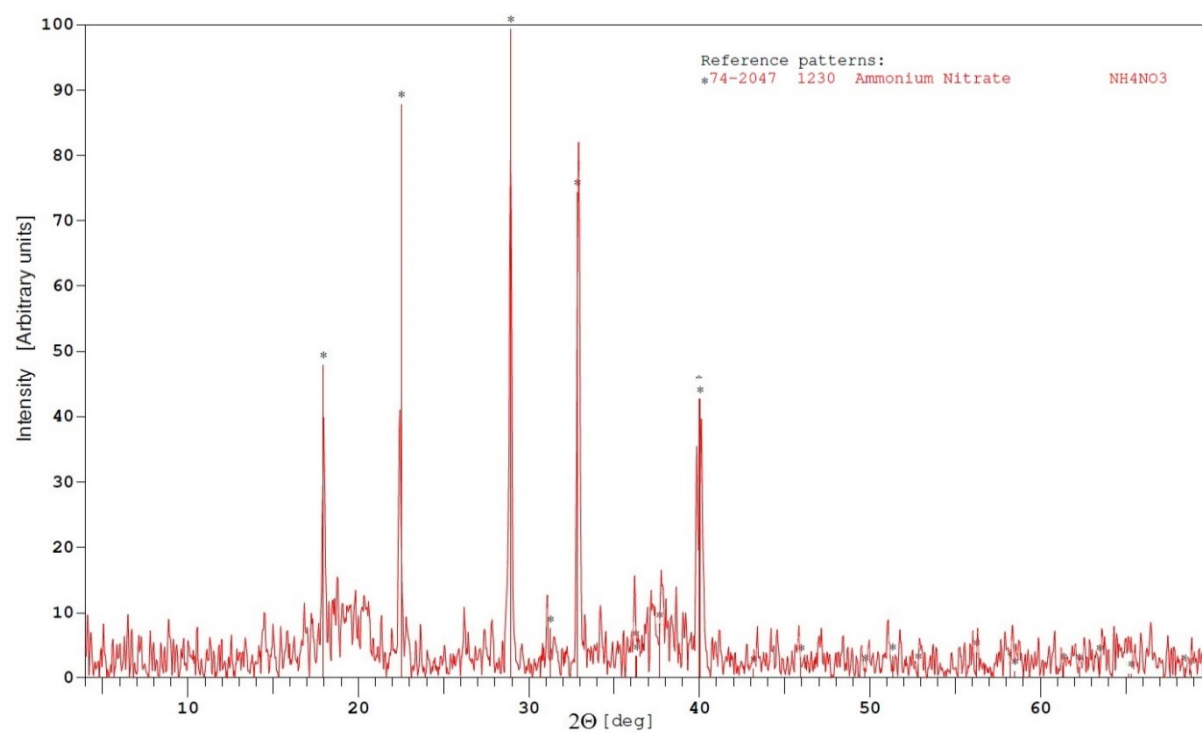

**Figure S25** PXRD of water-soluble product of I-110 °C.

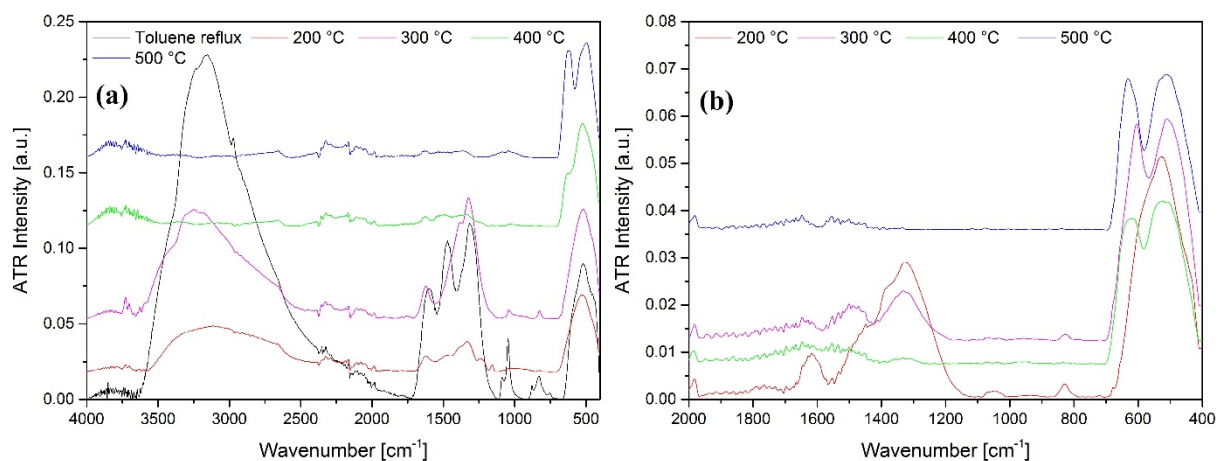

**Figure S26** IR spectra of the thermal decomposition products of compound **2** under boiling toluene and after under air. Heat treatment **(a)** without and **(b)** with water soluble part (left back after decomposition in toluene).

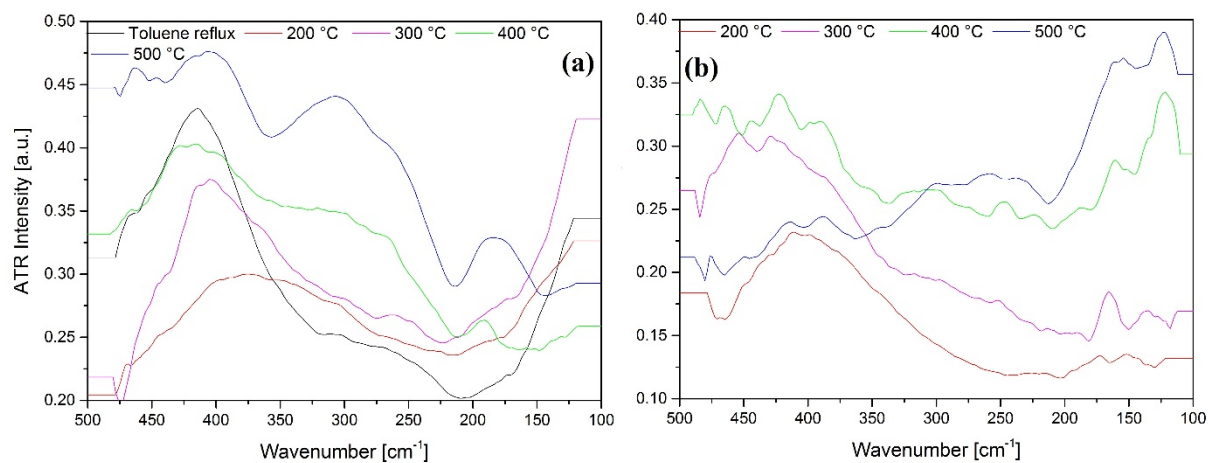

**Figure S27** Far-range IR spectra of the thermal decomposition products of compound **2** under boiling toluene and after under air. Heat treatment **(a)** without and **(b)** with water soluble part (left back after decomposition in toluene).

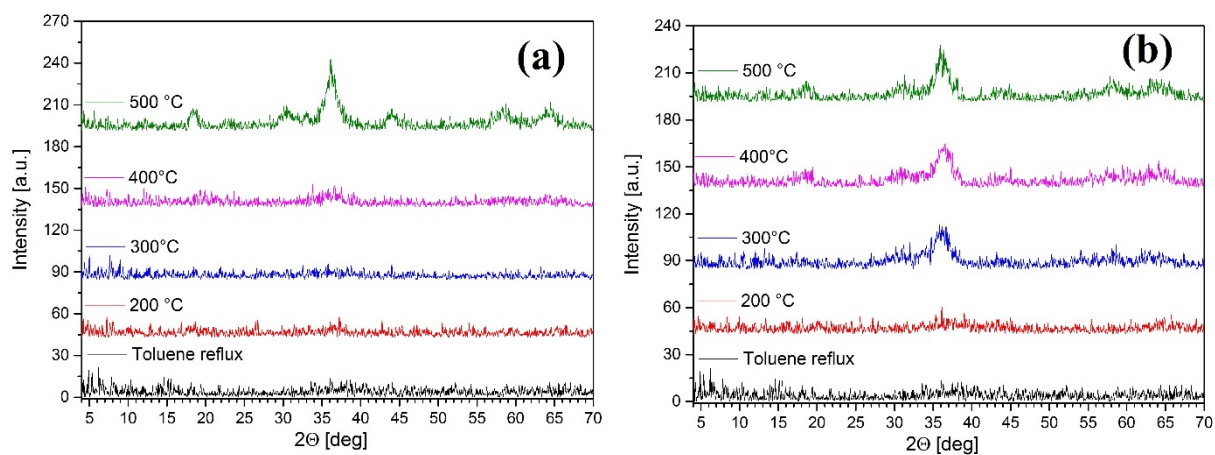

**Figure S28** PXRD of the thermal decomposition products of compound **2** under boiling toluene and after under air. Heat treatment (a) without and (b) with water soluble part (left back after decomposition in toluene).
